# Supplementary material for: Biological and Mechanical Properties of Platelet-Rich Fibrin Membranes after Thermal Manipulation and Preparation in a Single-Syringe Closed System
Source: MDPI journal article supplement (doi:10.3390/ijms19113433), 2018-11-01
Supplement: s1 [file s1]

## Supplementary Material

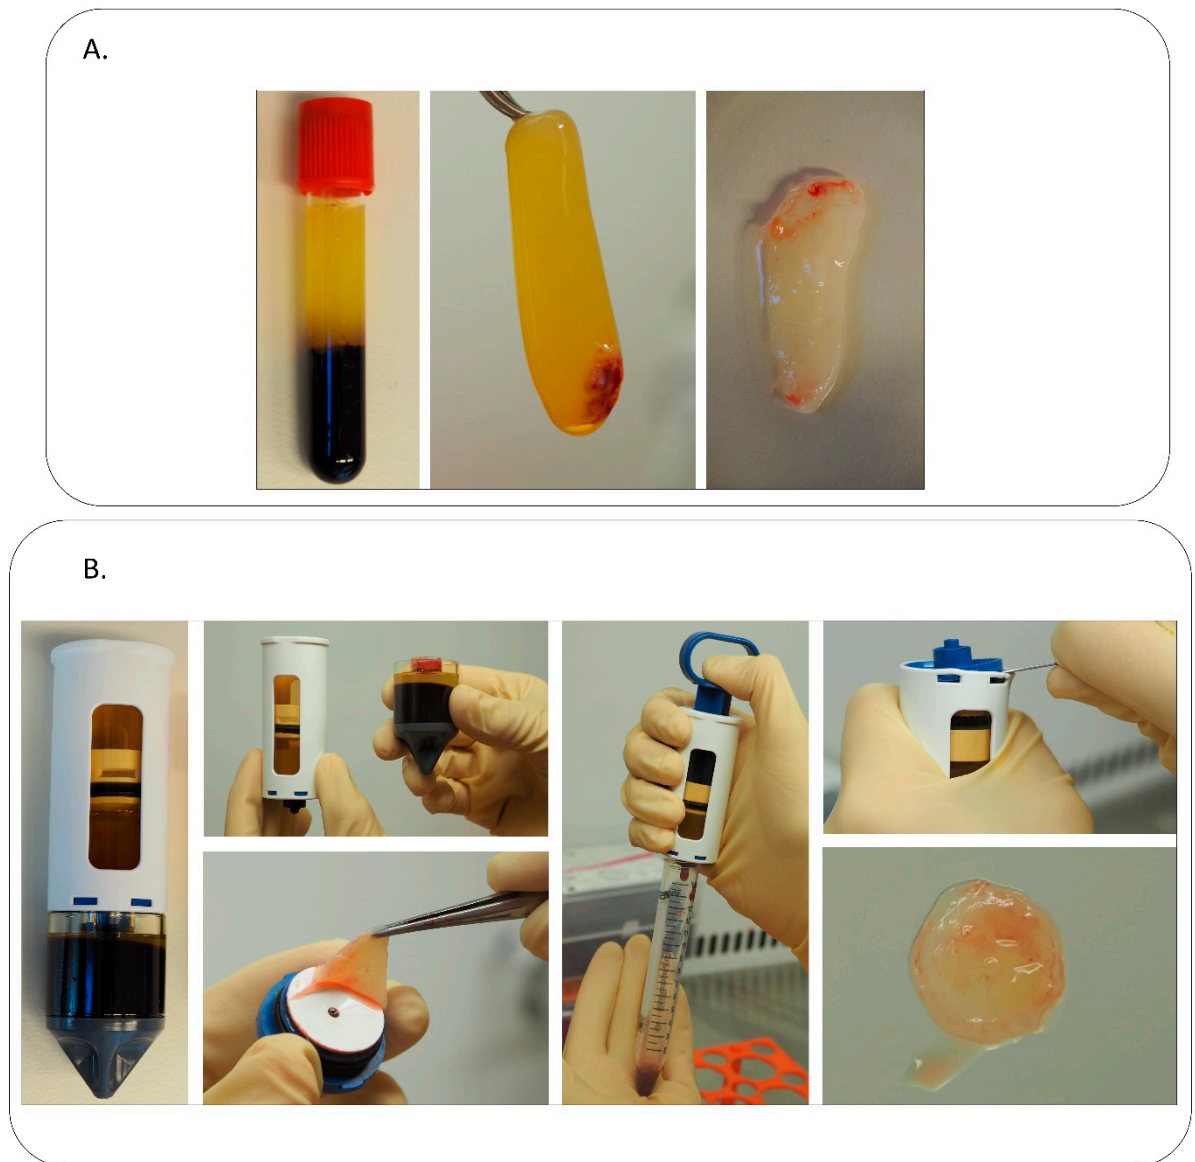

**Figure S1.** PRF membrane preparation by glass blood drawing tube (A.) and by a medical device, called hypACT Inject (B.).

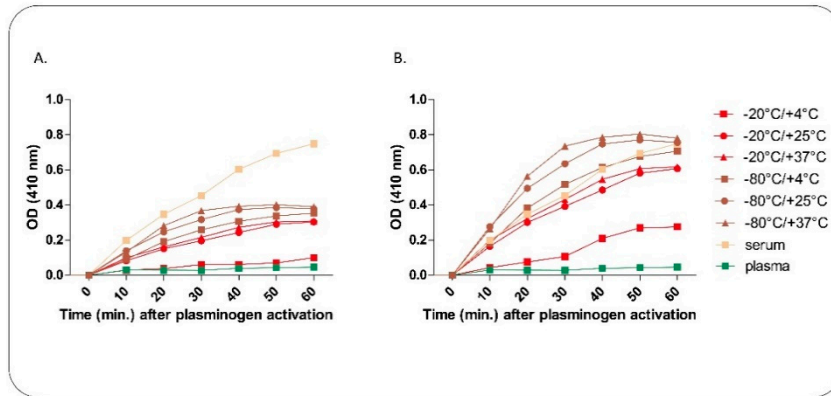

**Figure S2.** Plasmin activity of frozen GT (A.) and HI (B.) PRF membranes. In case of frozen PRF membrane samples we produced six different samples, with combining the freezing (-20°C or -80°C) and thawing (+4°C, +25°C, +37°C) temperatures.
